# Supplementary material
Source: PubMed Central journal article supplement (PMC5501864)
Supplement: NIHMS869802-supplement-SI.pdf [file NIHMS869802-supplement-SI.pdf]

## Supplemental Figures

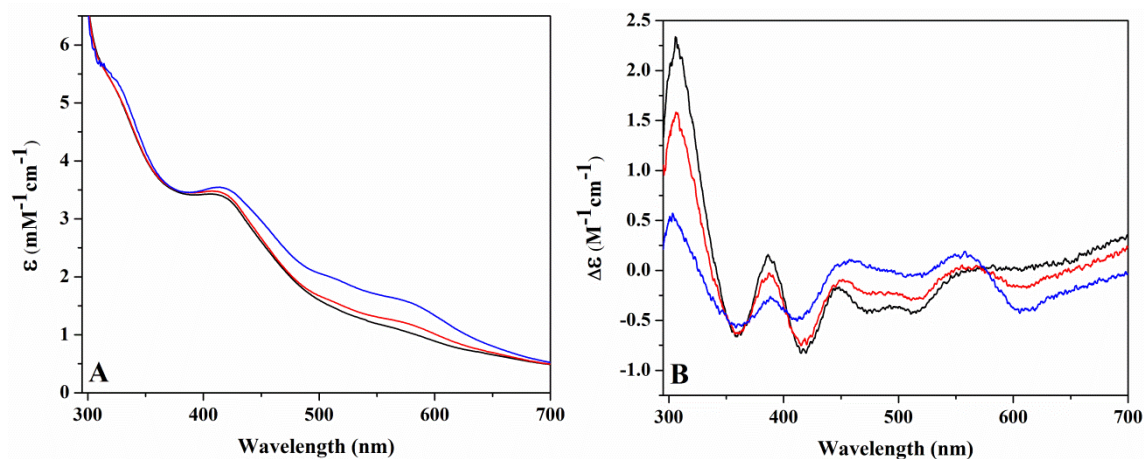

**Figure S1.** Changes in spectroscopic properties accompanying successive freeze/thaw events for a single sample of HydF. **A.** UV-visible absorbance changes for freshly purified HydF (152  $\mu\text{M}$  protein at  $2.34 \pm 0.10$  Fe/dimer; black), freshly purified enzyme following a single freeze-thaw event (red), and freshly purified enzyme following a second freeze-thaw event (blue).  $\epsilon$  values are reported for total Fe concentration in sample. **B.** The corresponding circular dichroism spectra for the UV-vis spectra represented in panel A (color scheme is consistent);  $\Delta\epsilon$  values shown are for total iron content in samples.

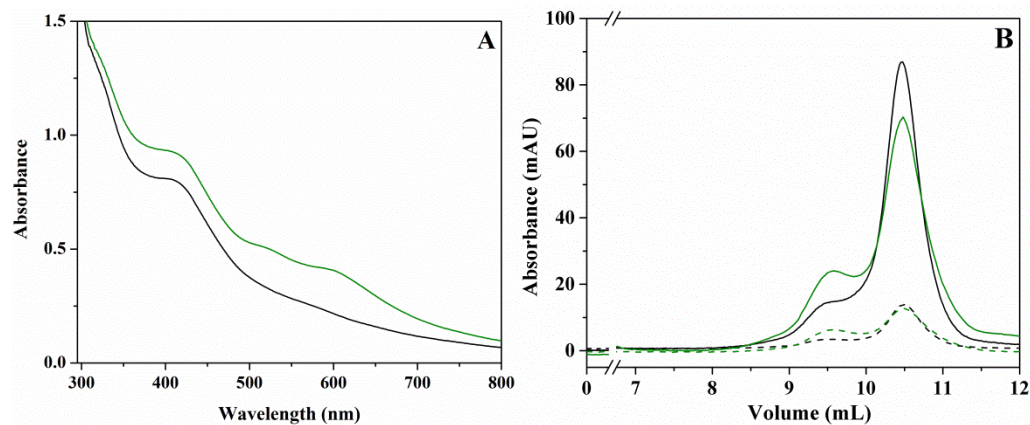

**Figure S2.** Changes in visible absorbance and oligomeric state upon sample handling of freshly purified HydF. **A.** UV-visible absorbance spectra for freshly purified HydF (black, peak fraction, 99  $\mu\text{M}$  protein at  $2.18 \pm 0.08$  Fe/dimer) and freshly purified HydF after concentration (green, side fractions pooled and concentrated, 102  $\mu\text{M}$  protein at  $2.48 \pm 0.06$  Fe/dimer). Side fractions were pooled together and concentrated using a Minicon B15 sponge well concentrator prior to UV-Vis and gel filtration analysis without undergoing a freeze/thaw event. **B.** The corresponding gel filtration data for the samples in A (color scheme is consistent between panels); for Panel B, the solid trace represents the signal at 280 nm, and the dashed trace represents the signal at 426 nm.

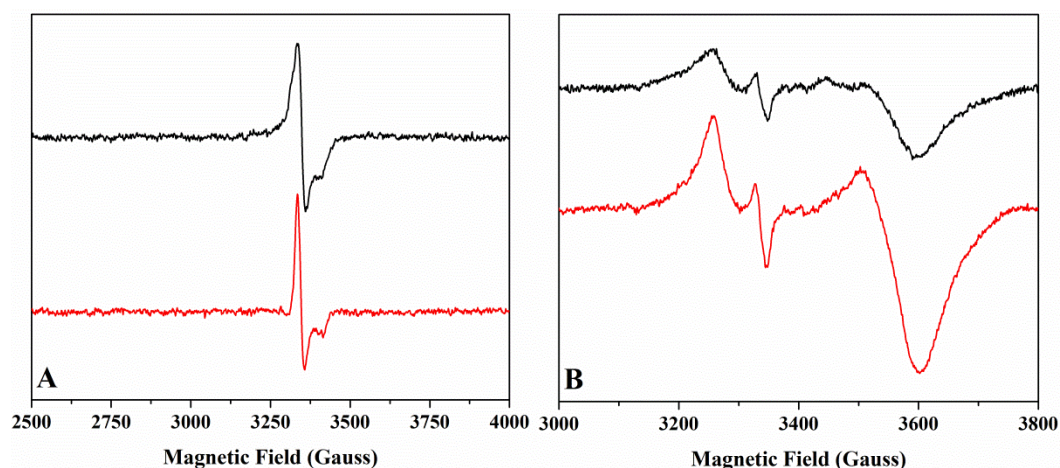

**Figure S3.** Representative CW X-band EPR spectra for freshly purified HydF. **A.** EPR spectra for freshly purified HydF (red, 111  $\mu\text{M}$  protein at  $2.50 \pm 0.08$  Fe/dimer) relative to freshly purified HydF that has been concentrated (black, 102  $\mu\text{M}$  protein at  $2.48 \pm 0.06$  Fe/dimer; see data and sample description provided in Figure S2). **B.** Photoreduced EPR spectra of the samples represented in panel **A** (red, 110  $\mu\text{M}$  protein at  $2.50 \pm 0.08$  Fe/dimer; black, 97  $\mu\text{M}$  protein at  $2.48 \pm 0.06$  Fe/dimer). All spectra recorded at 12 K with 1 mW microwave power.

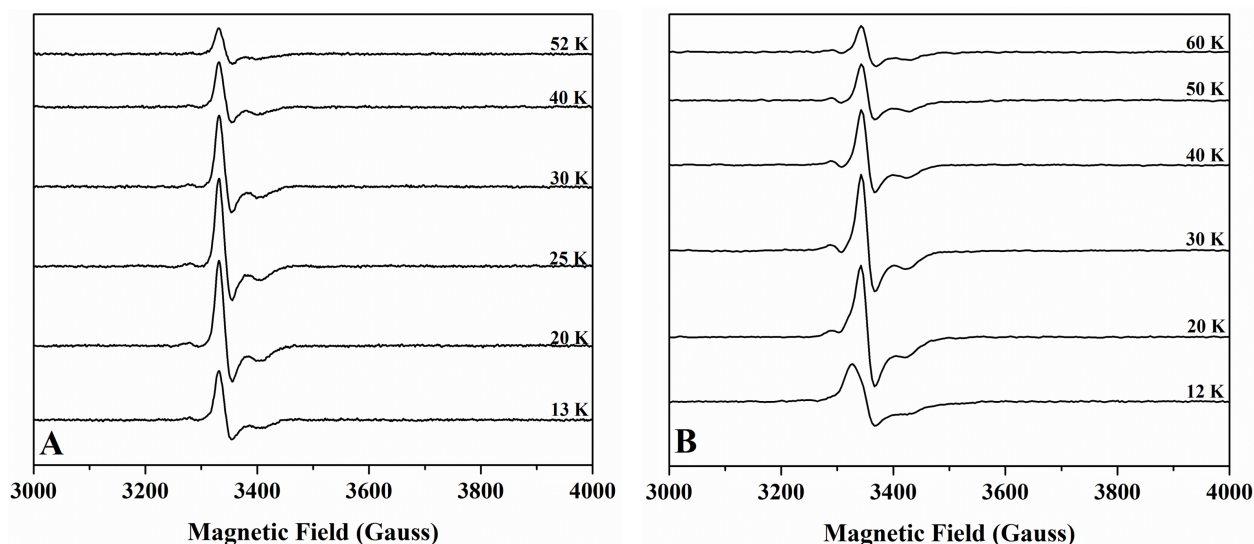

**Figure S4.** CW EPR (X-band) temperature relaxation profiles for HydF. **A.** Temperature relaxation profile for freshly purified HydF (111  $\mu\text{M}$  protein at  $2.50 \pm 0.08$  Fe/dimer) at 1 mW microwave power setting. The magnitude of the signal intensity (S.I., defined as the absolute value of the  $g \sim 2.00$  peak-to-peak feature) at each temperature value is provided. **B.** Temperature relaxation profile for as-isolated HydF (600  $\mu\text{M}$  protein at  $1.14 \pm 0.08$  Fe/dimer) at 1 mW microwave power setting.

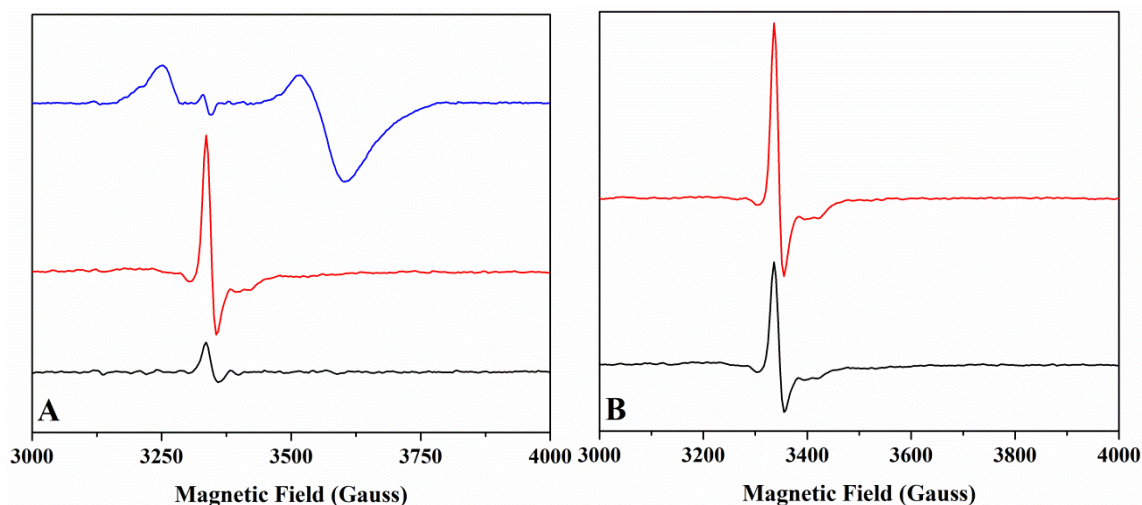

**Figure S5.** EPR spectra showing the effects of exogenous reducing agents on freshly purified HydF. **A.** The enzyme freshly purified in the absence of reducing agents (black), in the presence of 5 mM dithiothreitol (red), and in the presence of 5 mM dithionite (blue). All samples used 104  $\mu$ M protein at  $2.18 \pm 0.08$  Fe/dimer. Freshly purified and DTT spectra were recorded at 16 K, while the DT treated sample was recorded at 10.5 K. **B.** The signal of the DTT treated sample at 16 K (black) and 30 K (red) at 1 mW microwave power.

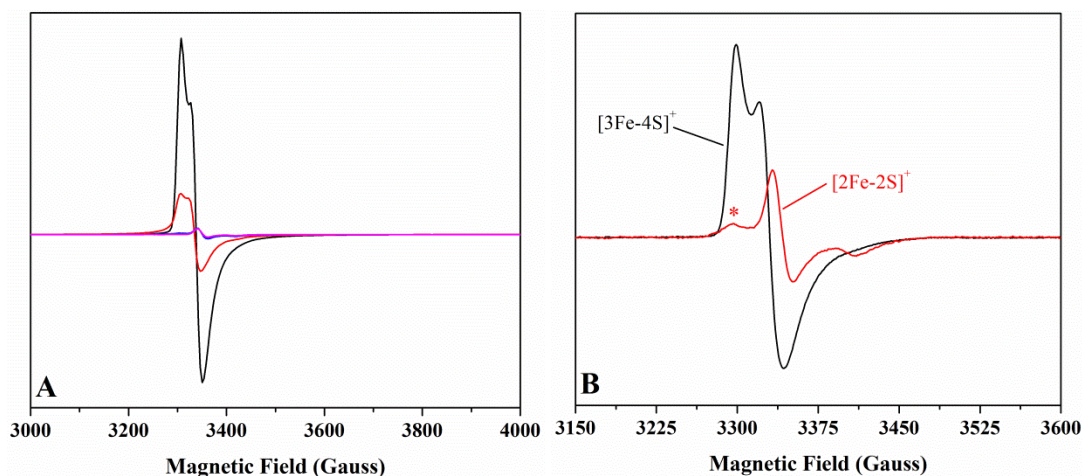

**Figure S6.** Low temperature CW (X-band) EPR spectroscopy of as-purified PFL-AE (1.68 mM protein with  $2.70 \pm 0.10$  Fe/protein). **A.** Temperature relaxation profile (black, 12K; red, 20 K; blue, 30 K; magenta, 40 K). **B.** Overlay of the  $[3\text{Fe-4S}]^+$  (black) and  $[2\text{Fe-2S}]^+$  (red) cluster signals in PFL-AE at low power settings. The  $[3\text{Fe-4S}]^+$  cluster signal was recorded at 12 K and 63  $\mu$ W microwave power using a gain setting of  $1 \times 10^2$ . The  $[2\text{Fe-2S}]^+$  cluster signal was recorded at 30 K and 63  $\mu$ W microwave power using a gain setting of  $1 \times 10^3$ . The red asterisk denotes residual  $[3\text{Fe-4S}]^+$  content in the 30 K spectrum.

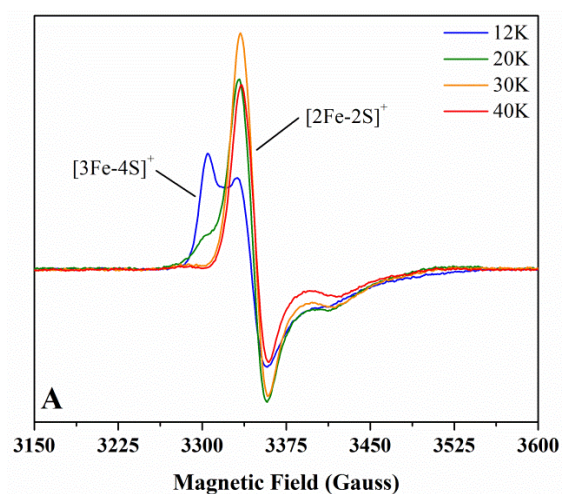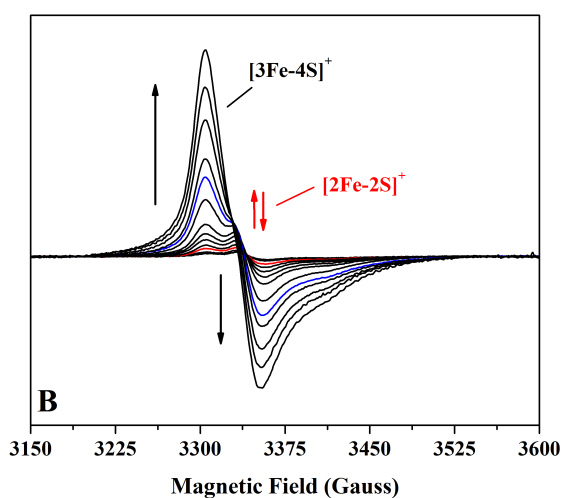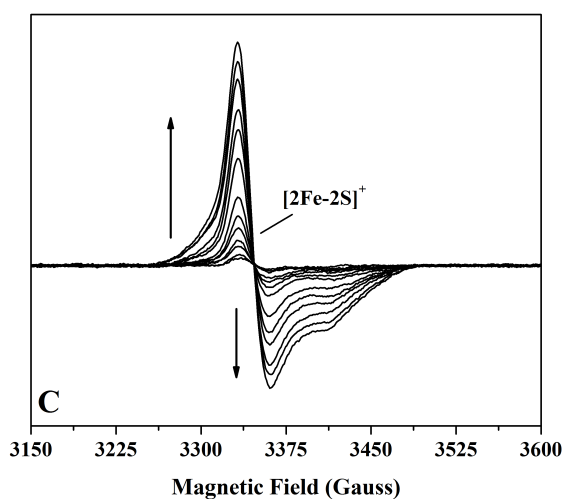

**Figure S7.** Low temperature CW X-band EPR spectra of as-reconstituted HydE. **A.** Temperature relaxation behavior of as-reconstituted enzyme. The [3Fe-4S]<sup>+</sup> component of the signal at 12 K rapidly relaxes as temperature is raised concomitant with the intensification of the [2Fe-2S]<sup>+</sup> component. **B.** The effects of increasing microwave power (12  $\mu$ W – 50 mW) on the

[3Fe-4S]<sup>+</sup> and [2Fe-2S]<sup>+</sup> cluster signals of as-reconstituted HydE at 12 K. The red highlighted spectrum shows the [2Fe-2S]<sup>+</sup> component signal at 63 μW whose signal intensity increases and then decreases as a function of power (red arrows); the blue highlighted spectrum is at 6 mW power where the [2Fe-2S]<sup>+</sup> component signal exhibits substantial saturation effects. The signal intensity of the [3Fe-4S]<sup>+</sup> cluster, which steadily grows as a function of increasing power, is highlighted by the black arrows. C. The effects of increasing microwave power (12 μW – 50 mW) on the [2Fe-2S]<sup>+</sup> cluster signal of as-reconstituted HydE at 30 K. The signal intensity of the [2Fe-2S]<sup>+</sup> cluster, which steadily increases as a function of increasing power, is highlighted by the black arrows. For all panels, HydE enzyme was 344 μM protein at 7.64 ± 0.10 Fe/protein.

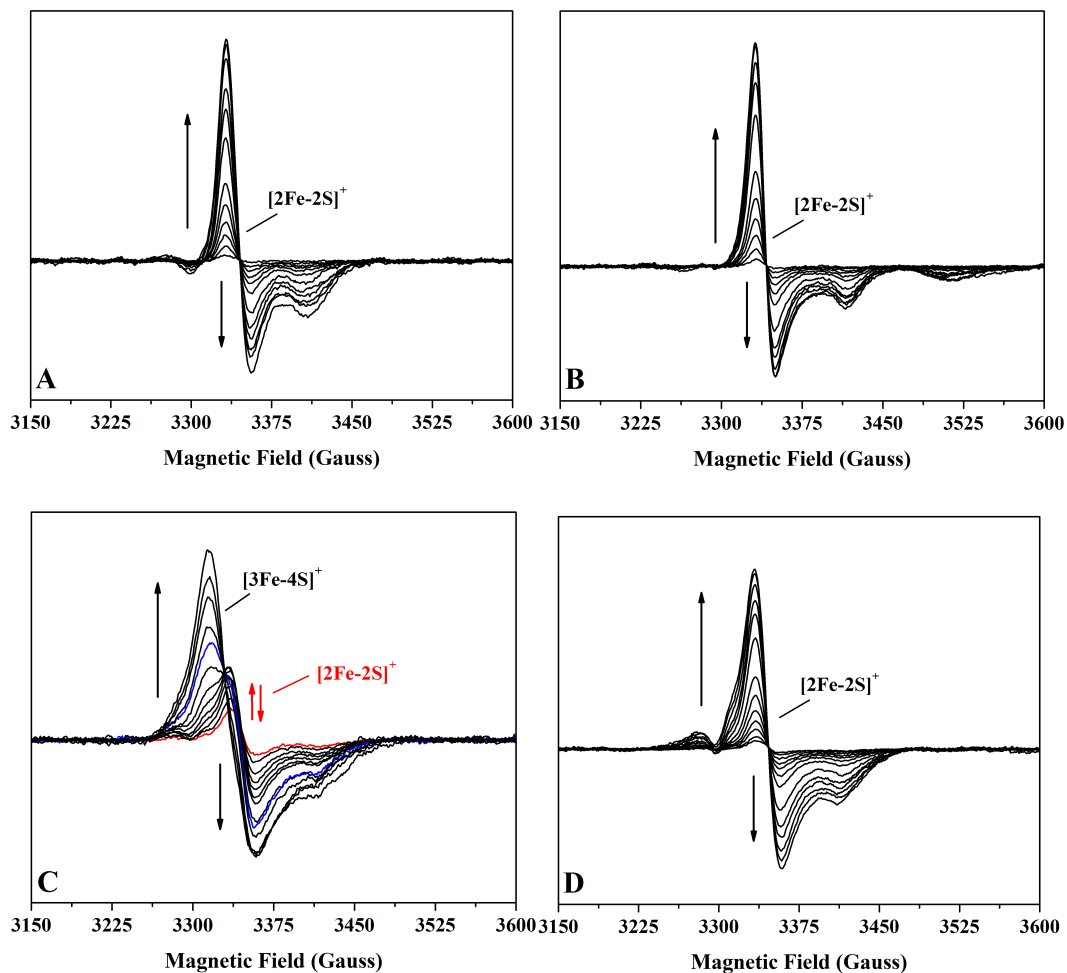

**Figure S8.** Low temperature, CW X-band EPR spectra of HydF as a function of varying microwave power settings. **A.** The  $[2\text{Fe-}2\text{S}]^+$  cluster signal in freshly purified HydF as a function of increasing microwave power ( $31 \mu\text{W} - 50 \text{ mW}$ ) recorded at 30 K ( $111 \mu\text{M}$  protein at  $2.50 \pm 0.08 \text{ Fe/dimer}$ ). The signal intensity of the  $[2\text{Fe-}2\text{S}]^+$  cluster, which steadily increases as a function of increasing power, is highlighted by the black arrows. **B.** The  $[2\text{Fe-}2\text{S}]^+$  cluster signal in freshly purified, photoreduced HydF as a function of increasing microwave power ( $31 \mu\text{W} - 50 \text{ mW}$ ) recorded at 30 K ( $110 \mu\text{M}$  protein at  $2.50 \pm 0.08 \text{ Fe/dimer}$ ). The feature present at  $\sim 3525 \text{ G}$  is residual  $[4\text{Fe-}4\text{S}]^+$  cluster signal. The signal intensity of the  $[2\text{Fe-}2\text{S}]^+$  cluster, which steadily increases as a function of increasing power, is highlighted by the black arrows. **C.** The effects of increasing microwave power ( $12 \mu\text{W} - 50 \text{ mW}$ ) on the  $[3\text{Fe-}4\text{S}]^+$  and  $[2\text{Fe-}2\text{S}]^+$  cluster signals of as-isolated HydF at 15 K ( $600 \mu\text{M}$  protein at  $1.14 \pm 0.08 \text{ Fe/dimer}$ ). The red highlighted spectrum shows the  $[2\text{Fe-}2\text{S}]^+$  component signal at  $12 \mu\text{W}$  whose signal intensity increases and then decreases as a function of power (red arrows); the blue highlighted spectrum is at  $6 \text{ mW}$  power where the  $[2\text{Fe-}2\text{S}]^+$  component signal exhibits substantial saturation effects. The signal intensity of the  $[3\text{Fe-}4\text{S}]^+$  cluster, which steadily grows as a function of increasing power, is highlighted by the black arrows. **D.** The effects of increasing microwave power ( $12 \mu\text{W} - 50 \text{ mW}$ ) on the  $[2\text{Fe-}2\text{S}]^+$  cluster signal of as-isolated HydF at 30 K ( $600 \mu\text{M}$  protein at

1.14 ± 0.08 Fe/dimer). The signal intensity of the [2Fe-2S]<sup>+</sup> cluster, which steadily grows as a function of increasing power, is highlighted by the black arrows.

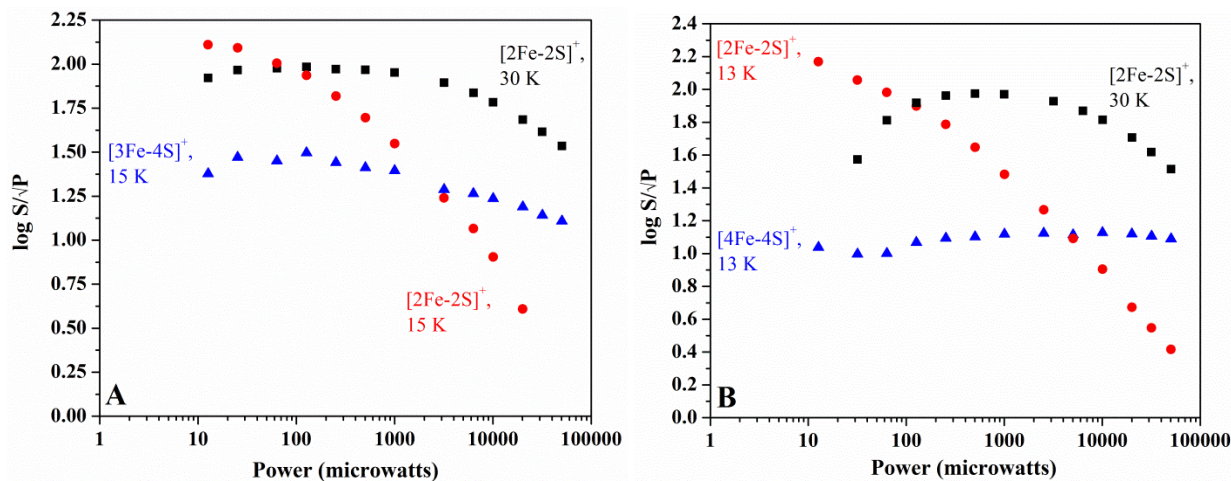

**Figure S9.** EPR microwave power saturation curves for HydF qualitatively comparing [2Fe-2S]<sup>+</sup>, [3Fe-4S]<sup>+</sup>, and [4Fe-4S]<sup>+</sup> cluster signal behavior. **A.** As-isolated HydF (600 μM protein at 1.14 ± 0.08 Fe/dimer) FeS cluster states. **B.** Photoreduced, freshly purified HydF (110 μM protein at 2.50 ± 0.08 Fe/dimer) FeS cluster states.

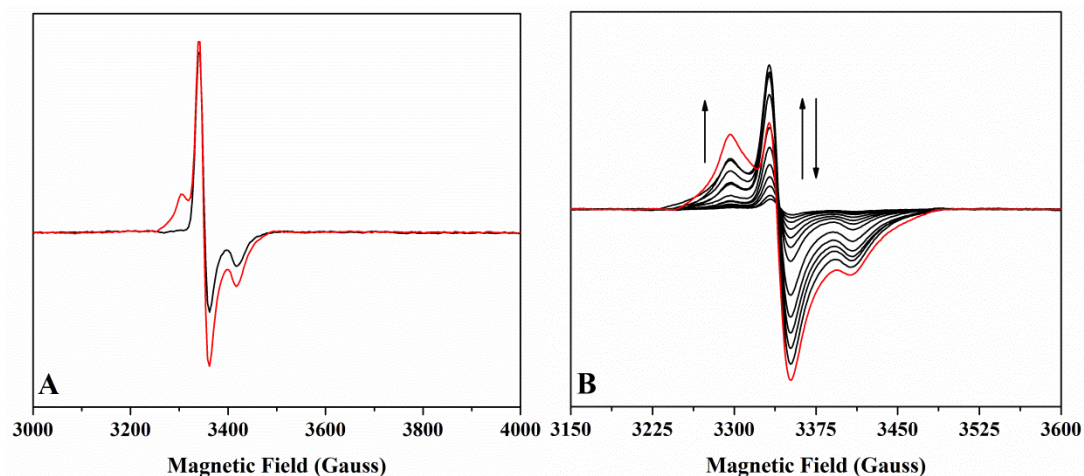

**Figure S10.** Low temperature CW X-band EPR spectroscopy of as-purified PFL-AE (1.68 mM protein with  $2.70 \pm 0.10$  Fe/protein). **A.** Temperature relaxation behavior recorded at 1 mW microwave power and either 30 K (red) or 40 K (black) highlighting the disappearance of the  $[3\text{Fe-4S}]^+$   $g = 2.035$  feature. **B.** Spectral changes at 30 K for the  $[3\text{Fe-4S}]^+$  and  $[2\text{Fe-2S}]^+$  cluster signals in PFL-AE as a function of increasing microwave power (12  $\mu\text{W}$  – 50 mW). The red spectrum highlights the 50 mW data wherein the  $[3\text{Fe-4S}]^+$  cluster signal at  $g = 2.035$  continues to increase in signal intensity, whereas the  $g \sim 2.0$  centered  $[2\text{Fe-2S}]^+$  cluster begins to visibly show saturation behavior. Collectively this data provided support for the assignment of two paramagnetic species present in the 30 K data which in turn aided spectral simulations (see Figure S11).



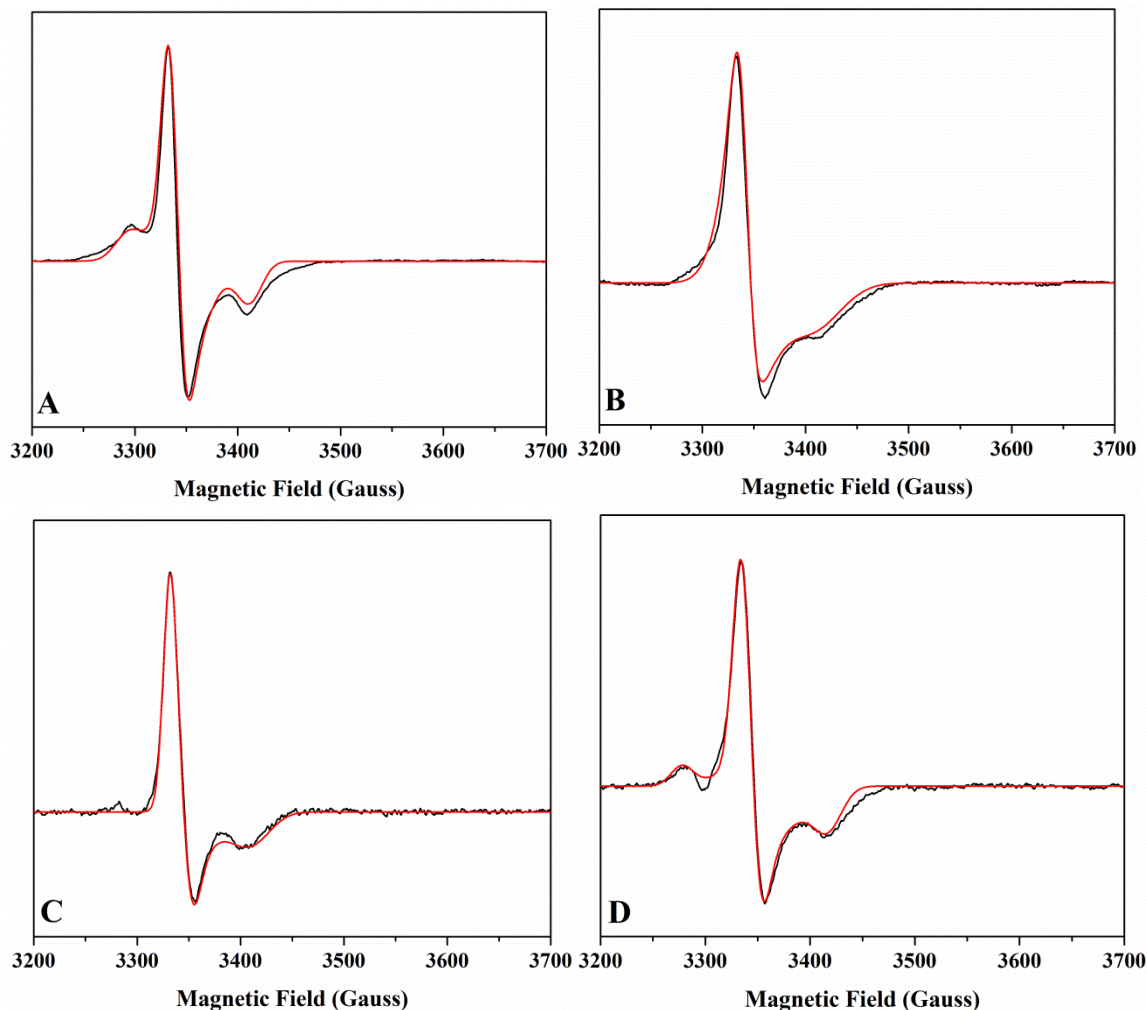

**Figure S11.** EasySpin spectral simulations of  $[2\text{Fe-2S}]^+$  cluster signals as observed at 30 K and 1 mW microwave power. In all panels, experimental data are shown in black while spectral simulations are represented in red. **A.** As-isolated PFL-AE (1.68 mM protein with  $2.70 \pm 0.10$  Fe/protein). The experimental spectrum is simulated as components of  $[2\text{Fe-2S}]^+$  and  $[3\text{Fe-4S}]^+$  cluster signals (see Figure S6 and Figure S10). **B.** As-reconstituted HydE (344  $\mu\text{M}$  protein at  $7.64 \pm 0.10$  Fe/protein). The experimental spectrum is simulated as a single  $[2\text{Fe-2S}]^+$  cluster signal. **C.** Freshly purified HydF (111  $\mu\text{M}$  protein at  $2.50 \pm 0.08$  Fe/dimer). The experimental spectrum is simulated as a single  $[2\text{Fe-2S}]^+$  cluster signal. **D.** As-isolated HydF (600  $\mu\text{M}$  protein at  $1.14 \pm 0.08$  Fe/dimer). The experimental spectrum is simulated as two distinct  $[2\text{Fe-2S}]^+$  cluster signals (see discussion in main text).

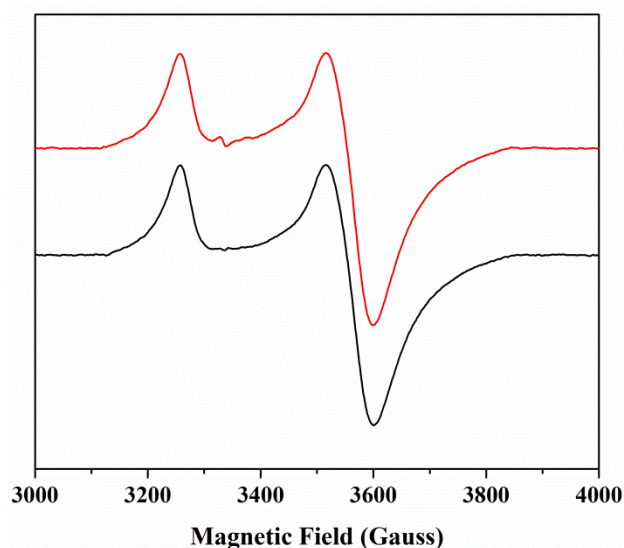

**Figure S12.** Low temperature CW X-band EPR monitoring the effects of 5 mM dithionite on HydF's FeS cluster signals. As-isolated, dithionite reduced HydF (72  $\mu$ M protein at  $2.54 \pm 0.04$  Fe/dimer) before (black) and after (red) a thaw/freeze event. Spectra recorded at 10.5 K.

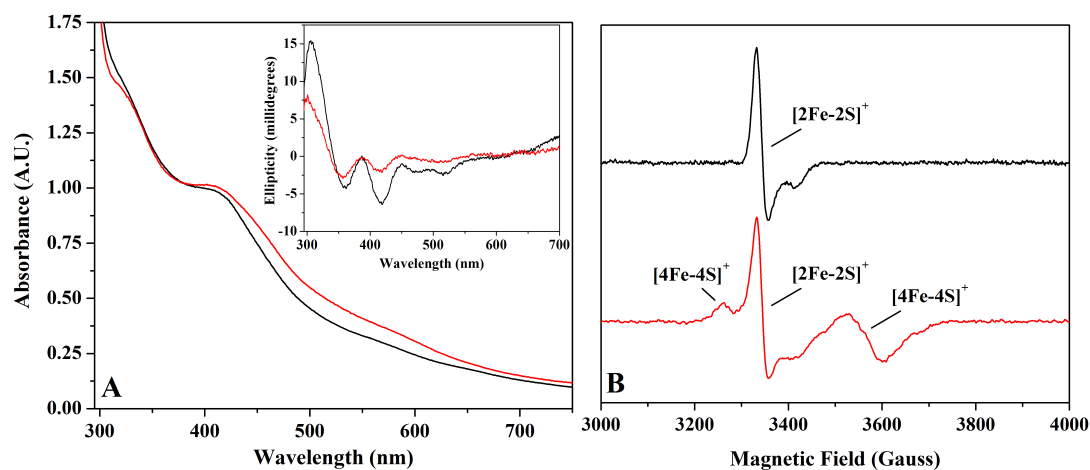

**Figure S13.** Changes in spectroscopic properties accompanying a freeze/thaw event in freshly purified HydF following gel filtration. **A.** UV-visible absorbance changes for HydF before (black; 71  $\mu$ M protein at  $3.10 \pm 0.11$  Fe/dimer) and after a single freeze-thaw event (red). *Inset.* The corresponding circular dichroism spectra for the UV-vis data (the color scheme for spectra is consistent). **B.** Low temperature, CW X-band EPR spectra for freshly purified HydF following gel filtration. Freshly purified enzyme (68  $\mu$ M protein at  $3.10 \pm 0.11$  Fe/dimer) recorded at 12.0 K (black trace). The 10.5 K EPR spectrum for photoreduced HydF (red trace) following an anaerobic thaw/freezing event (72  $\mu$ M protein at  $2.54 \pm 0.04$  Fe/dimer).

**Table S1.** Reported EPR spectroscopic g-values for [2Fe-2S]<sup>+</sup> and [3Fe-4S]<sup>+</sup> cluster signals. Values obtained via simulation with EasySpin as described in the main body.

| Enzyme                             | Cluster                      | Temperature | g <sub>1</sub> | g <sub>1</sub> -strain | g <sub>2</sub> | g <sub>2</sub> -strain | g <sub>3</sub> | g <sub>3</sub> -strain |
|------------------------------------|------------------------------|-------------|----------------|------------------------|----------------|------------------------|----------------|------------------------|
| Freshly purified HydF              | [2Fe-2S] <sup>+</sup>        | 12 K        | 2.010          | 0.010                  | 2.002          | 0.013                  | 1.963          | 0.024                  |
|                                    | [2Fe-2S] <sup>+</sup>        | 30 K        | 2.010          | 0.009                  | 2.002          | 0.012                  | 1.963          | 0.025                  |
| As-isolated HydF                   | [2Fe-2S] <sup>+</sup> -<br>A | 30 K        | 2.010          | 0.011                  | 2.003          | 0.012                  | 1.961          | 0.018                  |
|                                    | [2Fe-2S] <sup>+</sup> -<br>B | 30 K        | 2.045          | 0.015                  | 2.008          | 0.017                  | 1.981          | 0.024                  |
|                                    | [3Fe-4S] <sup>+</sup>        | 15 K        | 2.019          | 0.028                  | 2.010          | 0.022                  | 1.974          | 0.044                  |
| Freshly purified HydF Photoreduced | [2Fe-2S] <sup>+</sup>        | 30 K        | 2.010          | 0.009                  | 2.005          | 0.011                  | 1.960          | 0.020                  |
| HydE                               | [2Fe-2S] <sup>+</sup>        | 12 K        | 2.007          | 0.013                  | 2.004          | 0.020                  | 1.955          | 0.037                  |
|                                    | [3Fe-4S] <sup>+</sup>        | 12 K        | 2.027          | 0.009                  | 2.014          | 0.010                  | 1.988          | 0.042                  |
|                                    | [2Fe-2S] <sup>+</sup>        | 30 K        | 2.008          | 0.025                  | 2.006          | 0.010                  | 1.959          | 0.031                  |
| PFL-AE                             | [3Fe-4S] <sup>+</sup>        | 12 K        | 2.030          | 0.010                  | 2.009          | 0.011                  | 1.988          | 0.031                  |
|                                    | [3Fe-4S] <sup>+</sup>        | 30 K        | 2.035          | 0.019                  | 2.008          | 0.017                  | 1.993          | 0.023                  |
|                                    | [2Fe-2S] <sup>+</sup>        | 30 K        | 2.010          | 0.011                  | 2.005          | 0.011                  | 1.964          | 0.016                  |

A. Primary [2Fe-2S]<sup>+</sup> cluster signal. B. Low intensity paramagnetic cluster signal assigned as arising from a [2Fe-2S]<sup>+</sup> cluster signal given its slow temperature relaxation properties (Figure S4).

**Table S2.** EPR spin integrations for HydF and PFL-AE iron sulfur cluster signals.

| Enzyme                        | Cluster               | Conditions                        | Temperature (K) | Spin                     |
|-------------------------------|-----------------------|-----------------------------------|-----------------|--------------------------|
| HydF                          | [2Fe-2S] <sup>+</sup> | Freshly Purified                  | 12              | 0.03 – 0.05 <sup>a</sup> |
|                               |                       |                                   | 25              | 0.08                     |
|                               |                       | Freshly Purified + Dithiothreitol | 16              | 0.20                     |
|                               |                       |                                   | 30              | 0.27                     |
|                               |                       | Freshly Purified + Dithionite     | 12              | N/A                      |
| Reconstituted+ Dithiothreitol | 12                    | 0.15 – 0.19 <sup>a</sup>          |                 |                          |
| HydF                          | [4Fe-4S] <sup>+</sup> | Freshly Purified <sup>b</sup>     | 12              | 0.34 – 0.38 <sup>a</sup> |
|                               |                       | Freshly Purified + Dithionite     | 10.5            | 0.53                     |
| PFL-AE                        | [2Fe-2S] <sup>+</sup> | As-isolated                       | 30              | 0.08                     |

<sup>a</sup> Reported spin integration range is for two independently made enzyme samples. <sup>b</sup> Samples were photoilluminated for 1 hr in the presence of 5-deazariboflavin. N/A, Not applicable.
